# Supplementary material for: Computational analysis of the receptor binding specificity of novel influenza A/H7N9 viruses
Source: PubMed Central journal article supplement (PMC5954268; doi:10.1186/s12864-018-4461-z), 2018-05-09
Supplement: 12864_2018_4461_MOESM1_ESM.pdf [file 12864_2018_4461_MOESM1_ESM.pdf]

**Additional file 1: Phylogenetic trees of influenza A/H7N9.** Time scale phylogenetic trees of PB2, PB1, PA, HA, NP, NA, M1 and NS1 genes of influenza H7N9 strain.

HA

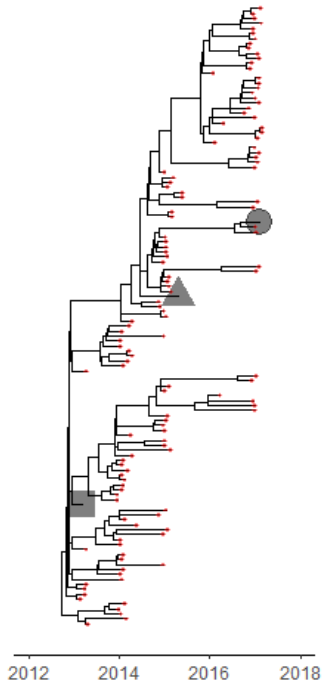

M1

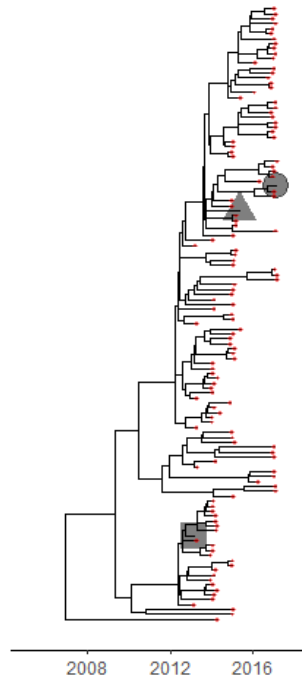

NA

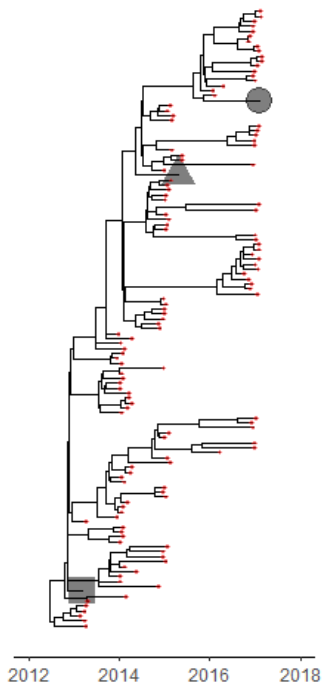

NP

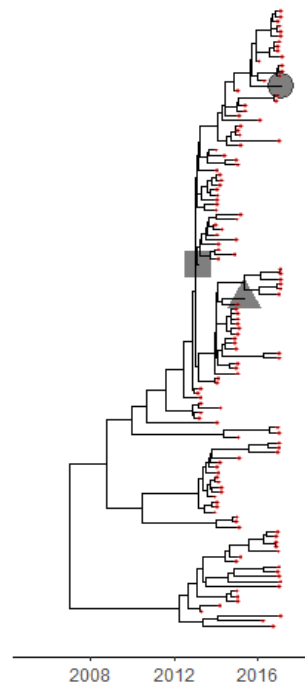

Isolate

- Taiwan/1/2017
- ▲ Quzhou/1/2015
- Shanghai/2/2013
- ◆ Others

Isolate

- Taiwan/1/2017
- ▲ Quzhou/1/2015
- Shanghai/2/2013
- ◆ Others

Isolate

- Taiwan/1/2017
- ▲ Quzhou/1/2015
- Shanghai/2/2013
- ◆ Others

Isolate

- Taiwan/1/2017
- ▲ Quzhou/1/2015
- Shanghai/2/2013
- ◆ Others

NS1

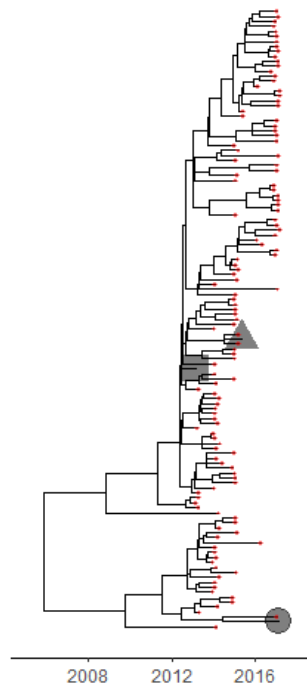

Isolate

- Taiwan/1/2017
- ▲ Quzhou/1/2015
- Shanghai/2/2013
- ◆ Others

PA

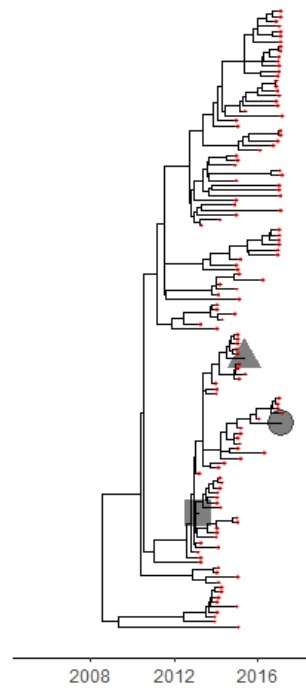

Isolate

- Taiwan/1/2017
- ▲ Quzhou/1/2015
- Shanghai/2/2013
- ◆ Others

PB1

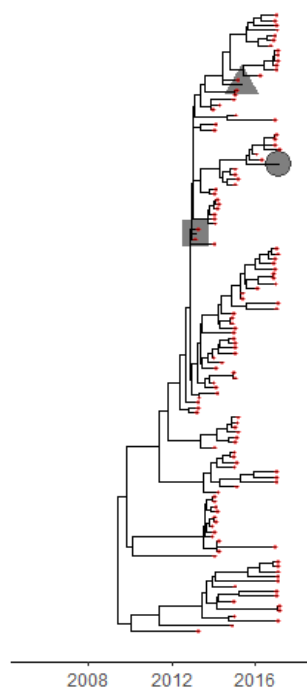

Isolate

- Taiwan/1/2017
- ▲ Quzhou/1/2015
- Shanghai/2/2013
- ◆ Others

PB2

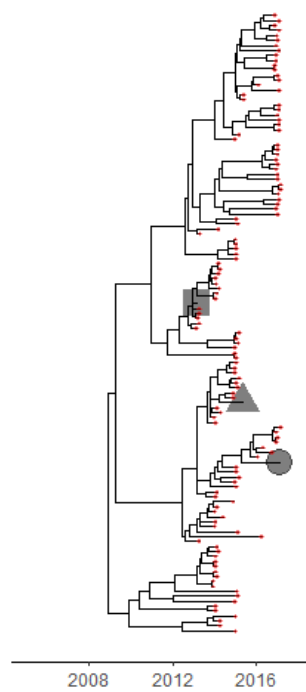

Isolate

- Taiwan/1/2017
- ▲ Quzhou/1/2015
- Shanghai/2/2013
- ◆ Others
