# Supplementary material for: Computational analysis of the receptor binding specificity of novel influenza A/H7N9 viruses
Source: PubMed Central journal article supplement (PMC5954268; doi:10.1186/s12864-018-4461-z), 2018-05-09

## Additional file 5. Residue contributions during the whole simulation process.

### 1. Energy contribution of the residues involved in interaction in the complex SH13-LSTa

For most residues, the residue-ligand interaction energy fluctuated within a small range, except S145 and S152.

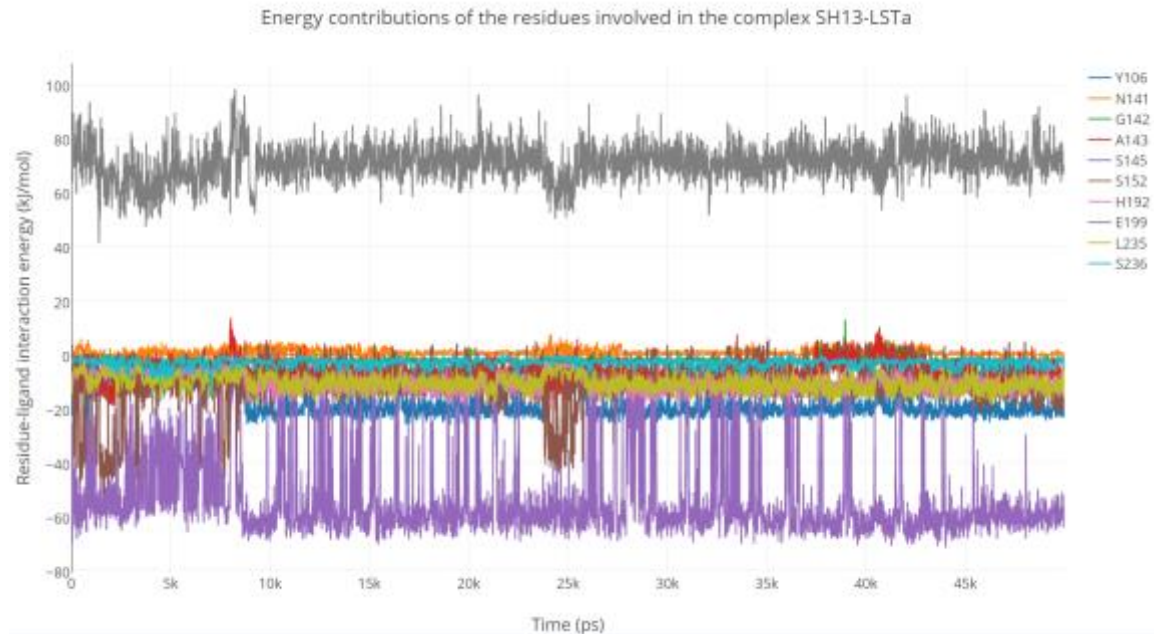

### 2. Energy contribution of the residues involved in interaction in the complex SH13-LSTc.

The residue-ligand interaction energy fluctuated within 10 kJ/mol after 20 ns.

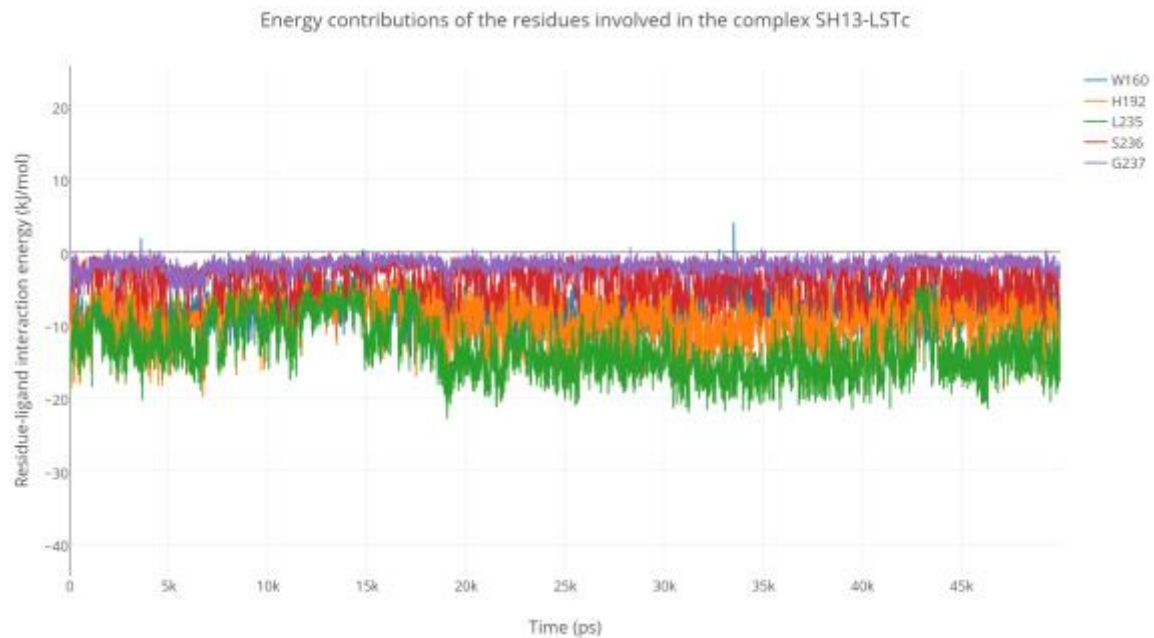

### 3. Energy contribution of the residues involved in interaction in the complex TW17-LSTa.

For most residues, the residue-ligand interaction energy fluctuated within a small range for the whole simulation process, except R139, which converged after 28 ns.

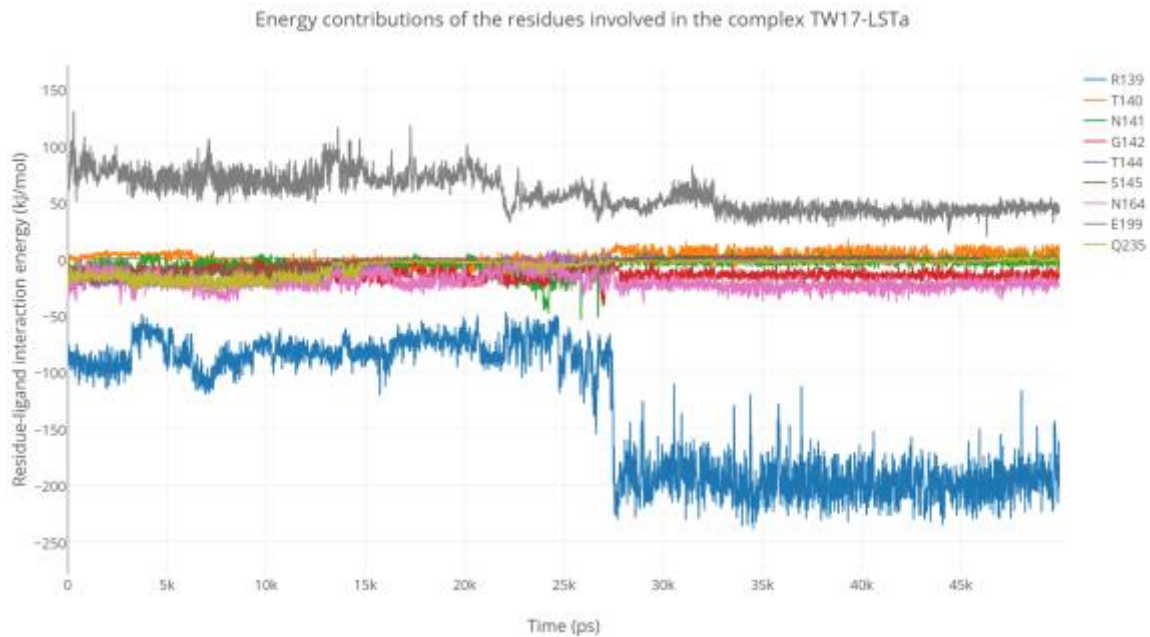

### 4. Energy contribution of the residues involved in interaction in the complex TW17-LSTc.

The residue-ligand interaction energy fluctuated within a small range. The fluctuation for R139 is slightly larger than the others.

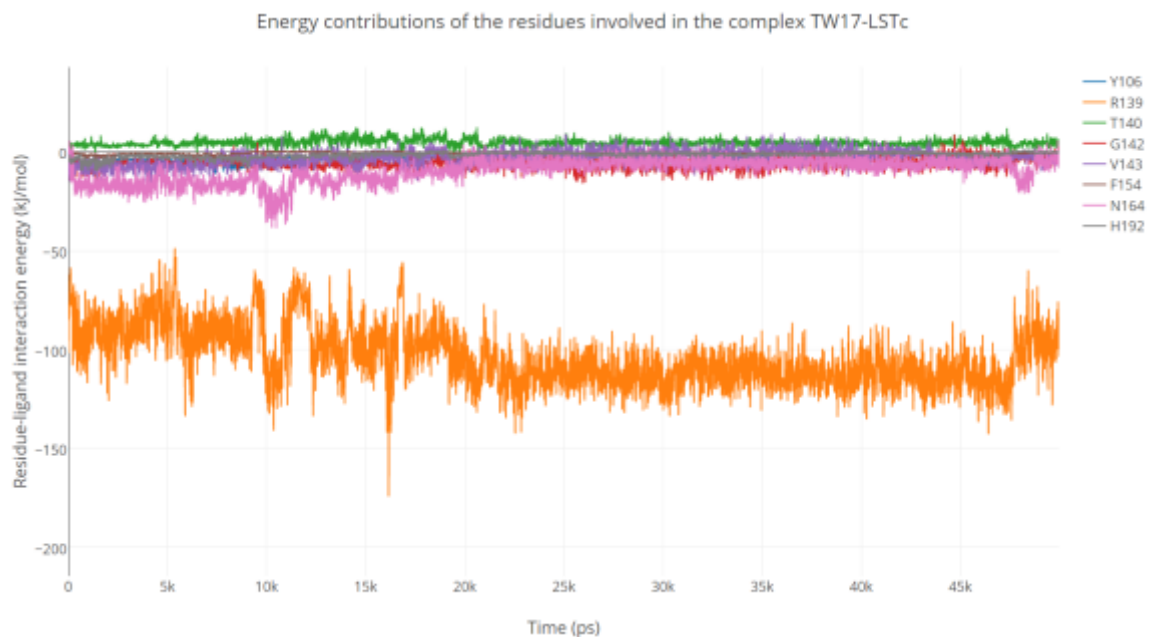

Supplement: 12864_2018_4461_MOESM5_ESM.pdf [file 12864_2018_4461_MOESM5_ESM.pdf]
