# Supplementary material for: Computational analysis of the receptor binding specificity of novel influenza A/H7N9 viruses
Source: PubMed Central journal article supplement (PMC5954268; doi:10.1186/s12864-018-4461-z), 2018-05-09

**Additional file 6. Average energy contribution of residues that involved in receptor-ligand interactions in the optimally docked complexes**

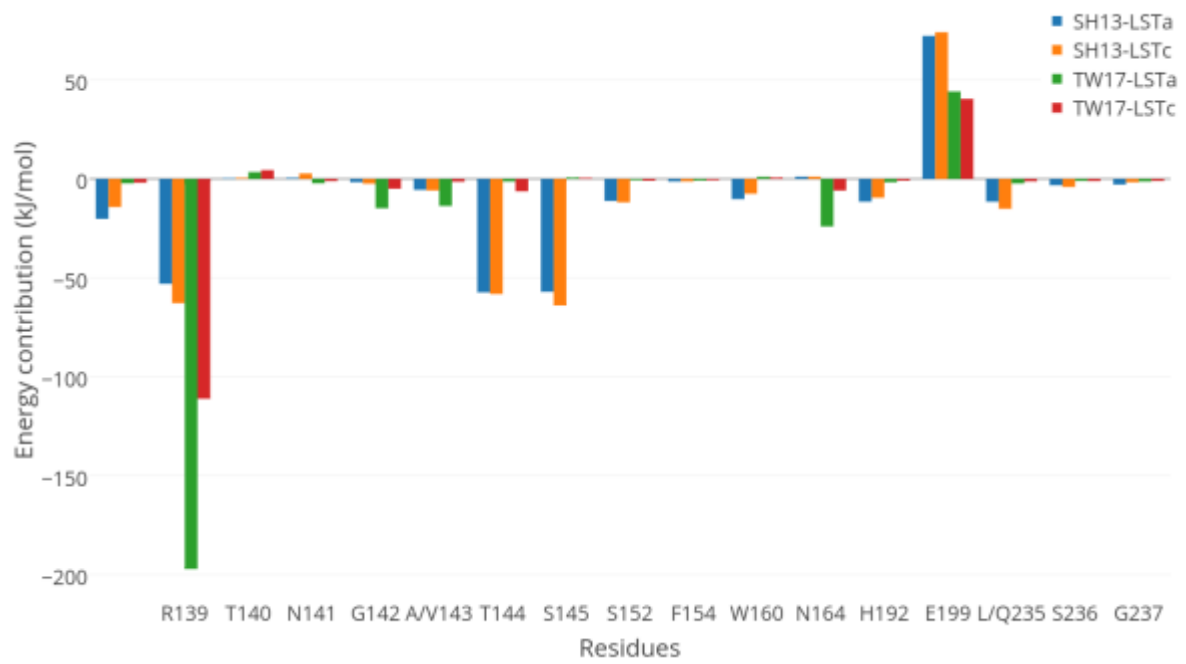

Supplement: 12864_2018_4461_MOESM6_ESM.pdf [file 12864_2018_4461_MOESM6_ESM.pdf]
